# Supplementary material for: Absorption and Excretion of Glucosinolates and Isothiocyanates after Ingestion of Broccoli (Brassica oleracea L. var italica) Leaf Flour in Mice: A Preliminary Study
Source: MDPI journal article supplement (doi:10.3390/nutraceuticals3040039), 2023-11-02
Supplement: s1 [file s1]

# Supplementary Materials: Absorption and Excretion of Glucosinolates and Isothiocyanates after Ingestion of Broccoli (*Brassica oleracea* L. var *italica*) Leaf Flour in Mice: A Preliminary Study

Tânia Martins, Tiago Ferreira, Bruno Colaço, Beatriz Medeiros-Fonseca, Maria de Lurdes Pinto, Ana Novo Barros, Carlos Venâncio, Eduardo Rosa, Luís Miguel Antunes, Paula Alexandra Oliveira and Maria João Pires

Supplementary Table S1. Chromatographic conditions.

| Chromatographic conditions |                                            |
|----------------------------|--------------------------------------------|
| Flow                       | 0.3 mL min <sup>-1</sup>                   |
| Injection volume           | 10 µL                                      |
| Solvent A                  | 13 mM ammonium acetate pH 7                |
| Solvent B                  | Acetonitrile/formic acid (99.99:0.01, v/v) |
| Gradient                   |                                            |
| Time (min.)                | %B                                         |
| 0.20                       | 12.00                                      |
| 0.21                       | 70.00                                      |
| 1.00                       | 30.00                                      |
| 1.01                       | 52.00                                      |
| 2.50                       | 52.00                                      |
| 4.00                       | 100.00                                     |
| 7.00                       | 100.00                                     |
| 80.00                      | 12.00                                      |

Supplementary Table S2. Electrospray Ionisation (ESI) conditions.

| Electrospray Ionisation (ESI) conditions |      |
|------------------------------------------|------|
| Gas temperature (°C)                     | 225  |
| Gas Flow (L/min)                         | 8    |
| Nebulizer (psi)                          | 30   |
| Seath Gas Heater (°C)                    | 350  |
| Seath Gas Flow (L)                       | 10   |
| Capillary (V)                            | 3500 |
| VCharging (eV)                           | 1250 |

**Supplementary Table S3.** Retention time and MS2 fragmentation pattern (mass/charge (m/z) ratio) of intact glucosinolates and isothiocyanates.

| Compound <sub>z</sub> | Rt (min) | Parent ion<br>(m/z MS [M-H] <sup>-</sup> / m/z MS [M+H] <sup>+</sup> ) | Product ion<br>(m/z MS2 [M-H] <sup>-</sup> / m/z MS2 [M+H] <sup>+</sup> ) | Dwell | F<br>(eV) | CE<br>(eV) | Cell Acc | Polarity |
|-----------------------|----------|------------------------------------------------------------------------|---------------------------------------------------------------------------|-------|-----------|------------|----------|----------|
| GR                    | 0.626    | 438.0 / -                                                              | 196.0 / -                                                                 | 20    | 90        | 4          | 7        | Negative |
| GE                    | 1.211    | 420.0 / -                                                              | 97.1 / -                                                                  | 20    | 60        | 20         | 7        | Negative |
| GB                    | 1.27     | 447.2 / -                                                              | 97 / -                                                                    | 20    | 80        | 20         | 7        | Negative |
| GI                    | 0.648    | 421.9 / -                                                              | 357.7 / -                                                                 | 20    | 100       | 0          | 7        | Negative |
| SFN                   | 1.644    | - / 178.0                                                              | - / 114.0                                                                 | 20    | 75        | 4          | 7        | Positive |
| SFN-GSH               | 1.174    | - / 485.0                                                              | - / 178.0                                                                 | 20    | 115       | 0          | 7        | Positive |
| SFN-CYS               | 0.702    | - / 299.0                                                              | - / 178.0                                                                 | 20    | 80        | 0          | 7        | Positive |
| SFN-NAC               | 1.108    | - / 341.0                                                              | - / 178.0                                                                 | 20    | 80        | 0          | 7        | Positive |
| Erucin                | 0.444    | 141.1 / -                                                              | 59.0 / -                                                                  | 20    | 70        | 6          | 7        | Negative |
| I3C                   | 1.284    | - / 148.1                                                              | - / 77.1                                                                  | 20    | 70        | 25         | 7        | Positive |
| DIM                   | 1.66     | - / 247.1                                                              | - / 105.0                                                                 | 20    | 70        | 25         | 7        | Positive |
| Iberin                | 1.542    | - / 164.0                                                              | - / 105.0                                                                 | 20    | 90        | 6          | 7        | Positive |

<sup>z</sup>GR, glucoraphanin; GE, glucoerucin; GB, glucobrassicin; GI, glucoiberin; SFN, sulforaphane; SFN-GSH, sulforaphane-glutathione; SFN-CYS, sulforaphane-cysteine; SFN-NAC, sulforaphane-N-acetyl-cysteine; I3C, indole-3-carbinol; DIM, 3,3'-diindolylmethane; Rt, retention time; F, fragmentation energy; CE, collision energy.
